# Supplementary material for: Adsorptive and photo-Fenton properties of bimetallic MIL-100(Fe,Sn) and MIL-100(Fe,Ir) MOFs toward removal of tetracycline from aqueous solutions
Source: Royal Society of Chemistry journal article supplement (doi:10.1039/d4ma00196f), 2024-01-01
Supplement: d4ma00196f1.pdf [file d4ma00196f1.pdf]

## Adsorptive and photo-Fenton properties of bimetallic MIL-100(Fe,Sn) and MIL-100(Fe,Ir) MOFs toward removal of tetracycline from aqueous solutions

Naghmeh Sadat Mirbagheri<sup>ab</sup>, Philipp A. Heizmann<sup>ab</sup>, Vanessa Trouillet<sup>cd</sup>, Jan Büttner<sup>aef</sup>, Anna Fischer<sup>aef</sup> and Severin Vierrath<sup>ab\*</sup>

- University of Freiburg, Institute and FIT - Freiburg Center for Interactive Materials and Bioinspired Technologies, Georges-Köhler-Allee 105, 79110 Freiburg, Germany*
- Electrochemical Energy Systems, IMTEK - Department of Microsystems Engineering, University of Freiburg, Georges-Koehler-Allee 103, 79110 Freiburg, Germany*
- Karlsruhe Nano Micro Facility (KNMFi), Karlsruhe Institute of Technology, Hermann-von-Helmholtz-Platz 1, D-76344 Eggenstein-Leopoldshafen, Germany*
- Institute for Applied Materials, Energy Storage Systems, Karlsruhe Institute of Technology, Hermann-von-Helmholtz-Platz 1, D-76344 Eggenstein-Leopoldshafen, Germany*
- Institute of Inorganic and Analytic Chemistry, University of Freiburg, Albertstr. 21, 79104 Freiburg, Germany*
- Cluster of Excellence livMatS @ FIT – Freiburg Center for Interactive Materials and Bioinspired Technologies, University of Freiburg, Georges-Köhler-Allee 105, D-79110 Freiburg, Germany*

\* Corresponding author's E-mail: [severin.vierrath@imtek.uni-freiburg.de](mailto:severin.vierrath@imtek.uni-freiburg.de)

**Table S1.** Dark adsorption and photo-Fenton degradation efficiency of the synthesized MOFs

| Synthesized MOFs     | Dark adsorption | Photo-Fenton degradation |
|----------------------|-----------------|--------------------------|
|                      | TC removal (%)  | TC removal (%)           |
| MIL-100(Fe)          | 13.2 ± 2.6      | 57.3 ± 6.3               |
| MIL-100(Fe,Sn-1.8)   | 12.3 ± 3.0      | 27.9 ± 4.8               |
| MIL-100(Fe,Sn-3.5)   | 16.3 ± 1.7      | 38.3 ± 7.7               |
| MIL-100(Fe,Sn-7.1)   | 18.0 ± 2.0      | 58.0 ± 5.6               |
| MIL-100(Fe,Sn-14.2)  | 16.6 ± 0.9      | 51.2 ± 9.6               |
| MIL-100(Fe,Ir-26.7)  | 32.1 ± 3.1      | 55.9 ± 1.2               |
| MIL-100(Fe,Ir-50.2)  | 43.9 ± 0.7      | 44.8 ± 1.0               |
| MIL-100(Fe,Ir-62.3)  | 47.6 ± 2.6      | 43.2 ± 0.3               |
| MIL-100(Fe,Ir-100.5) | 52.2 ± 3.5      | 38.5 ± 2.7               |

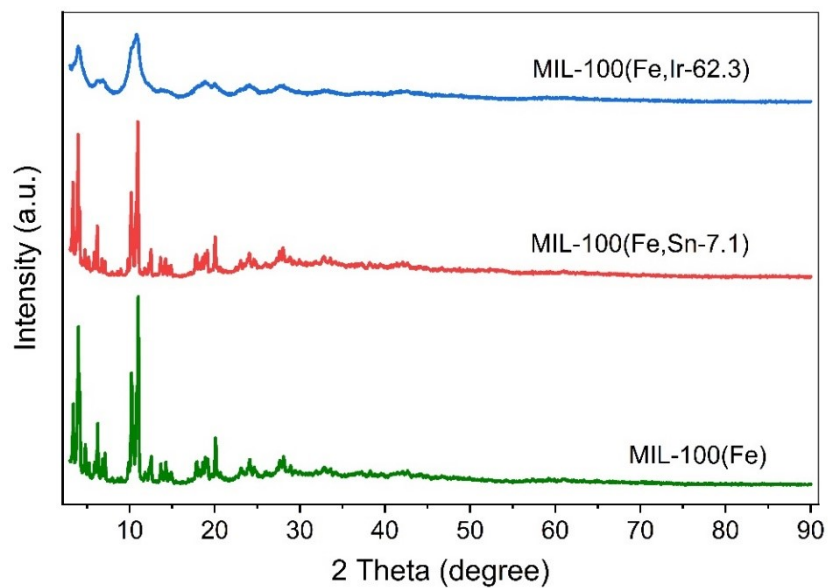

**Fig. S1.** XRD spectra of MIL-100(Fe), MIL-100(Fe,Sn-7.1), and MIL-100(Fe,Ir-62.3).

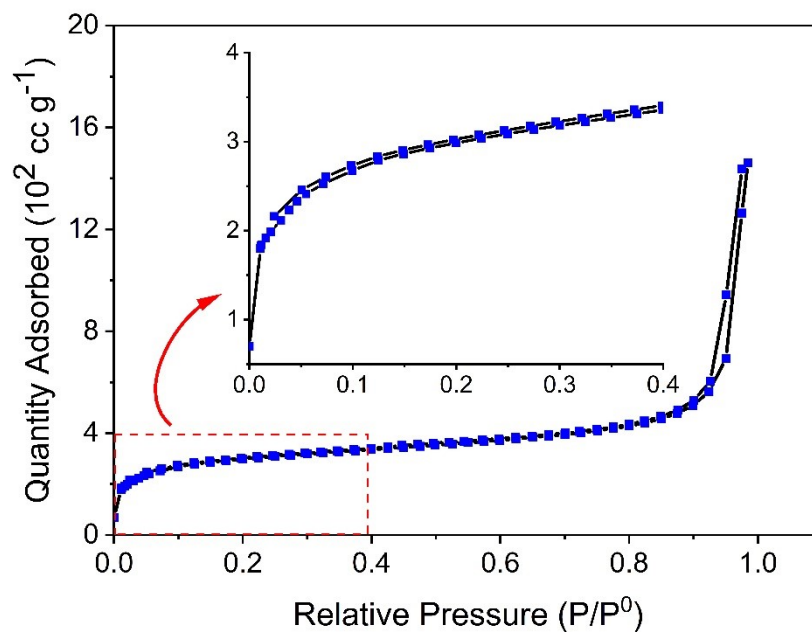

**Fig. S2.** Nitrogen adsorption-desorption isotherms of MIL-100(Fe,Ir-62.3).

**Table S2.** Doping metal content of the initial reactants and synthesized MOFs

| MOFs                | Dopant           | $\text{mol}_{\text{dopant}} / (\text{mol}_{\text{dopant}} + \text{mol}_{\text{Fe}})$ |                  |
|---------------------|------------------|--------------------------------------------------------------------------------------|------------------|
|                     |                  | Initial reactants                                                                    | Synthesized MOFs |
| MIL-100(Fe,Sn-7.1)  | Sn <sup>2+</sup> | 9.9%                                                                                 | 3.6%             |
| MIL-100(Fe,Ir-62.3) | Ir <sup>3+</sup> | 49%                                                                                  | 1.6%             |
